# Supplementary material for: Kinome expression profiling and prognosis of basal breast cancers
Source: Mol Cancer. 2011 Jul 21;10:86. doi: 10.1186/1476-4598-10-86 (PMC3156788; doi:10.1186/1476-4598-10-86)
Supplement: Additional file 4 — Table S3: Molecular subtypes and histoclinical features of the pooled data sets. [file 1476-4598-10-86-S4.XLS]

## Sheet: Table S3
	Table S3: Molecular subtypes and histoclinical features of the pooled data sets
	Characteristics (N)	Basal	ERBB2	Luminal A	Luminal B	Normal-like	p-value
		N=591	N=343	N=794	N=429	N=358
		N (% of evaluated cases)
	Age (1658)						3.0 E-05*
	≤ 50 years	215 (57%)	140 (59%)	231 (43%)	149 (52%)	98 (46%)
	> 50 years	162 (43%)	99 (41%)	312 (57%)	135 (48%)	117 (54%)
	Histological type (831)						7.1 E-04**
	ductal	234 (91%)	81 (93%)	197 (80%)	114 (85%)	87 (80%)
	lobular	7 (3%)	0 (0%)	20 (8%)	6 (4%)	8 (7%)
	other	15 (6%)	6 (7%)	23 (10%)	14 (10%)	14 (13%)
	Pathological tumor size, pT (1946)						<1.0 E-12**
	pT1	115 (25%)	107 (38%)	281 (44%)	107 (33%)	119 (48%)
	pT2-4	351 (75%)	172 (62%)	351 (56%)	216 (67%)	127 (52%)
	Pathological lymph node status, pN (1987)						2.81 E-03**
	negative	314 (64%)	129 (54%)	432 (66%)	216 (66%)	191 (70%)
	positive	179 (36%)	111 (46%)	222 (34%)	111 (34%)	82 (30%)
	Tumor grade (2112)						<1.0 E-12**
	SBR 1	14 (3%)	18 (6%)	182 (27%)	36 (10%)	86 (30%)
	SBR 2-3	479 (97%)	284 (94%)	490 (73%)	319 (90%)	204 (70%)
	IHC ER status (2045)						1.0 E-05**
	negative	407 (80%)	131 (46%)	86 (13%)	30 (9%)	83 (32%)
	positive	100 (20%)	155 (54%)	556 (87%)	318 (91%)	179 (68%)
	IHC PR status (779)						1.0 E-05**
	negative	198 (89%)	68 (72%)	59 (24%)	34 (29%)	41 (43%)
	positive	25 (11%)	27 (28%)	188 (76%)	84 (71%)	55 (57%)
	IHC ERBB2 status (406)						1.0 E-05**
	negative	88 (84%)	14 (26%)	119 (88%)	64 (82%)	26 (76%)
	positive	17 (16%)	39 (74%)	17 (12%)	14 (18%)	8 (24%)
	5-year DFS	0.61	0.61	0.83	0.6	0.77	<1.0 E-12***
	N, number of tumor samples - out of the 2515 samples - with available information for the corresponding characteristic
	*, T-test; **, Fisher's exact test; ***, log-rank test
