# Supplementary material for: Kinome expression profiling and prognosis of basal breast cancers
Source: Mol Cancer. 2011 Jul 21;10:86. doi: 10.1186/1476-4598-10-86 (PMC3156788; doi:10.1186/1476-4598-10-86)
Supplement: Additional file 5 — Table S4: Description of the three genes clusters identified with QT clustering. [file 1476-4598-10-86-S5.XLS]

## Sheet: Table S4
Table S4: Description of the three genes clusters identified with QT clustering
SYMBOL	DESCRIPTION	LOCUS	Entrez GeneID	Affymetrix PID
Immune-related cluster
ZAP70	zeta-chain (TCR) associated protein kinase 70kDa	2q12	7535	1555613_a_at
PTK2B	PTK2B protein tyrosine kinase 2 beta	8p21.1	2185	203110_at
CD4	CD4 molecule	12pter-p12	920	203547_at
CCL4	chemokine (C-C motif) ligand 4	17q12	6351	204103_at
GMFG	glia maturation factor, gamma	19q13.2	9535	204220_at
PIM2	pim-2 oncogene	Xp11.23	11040	204269_at
LCK	lymphocyte-specific protein tyrosine kinase	1p34.3	3932	204891_s_at
LCP2	lymphocyte cytosolic protein 2 (SH2 domain containing leukocyte protein of 76kDa)	5q33.1-qter	3937	205269_at
CD3E	CD3e molecule, epsilon (CD3-TCR complex)	11q23	916	205456_at
BTK	Bruton agammaglobulinemia tyrosine kinase	Xq21.33-q22	695	205504_at
BLK	B lymphoid tyrosine kinase	8p23-p22	640	206255_at
TTN	titin	2q31	7273	208195_at
FGR	Gardner-Rasheed feline sarcoma viral (v-fgr) oncogene homolog	1p36.2-p36.1	2268	208438_s_at
TGFBR2	transforming growth factor, beta receptor II (70/80kDa)	3p22	7048	208944_at
PRKCB	protein kinase C, beta	16p11.2	5579	209685_s_at
PRKCQ	protein kinase C, theta	10p15	5588	210038_at
ITK	IL2-inducible T-cell kinase	5q31-q32	3702	211339_s_at
FYN	FYN oncogene related to SRC, FGR, YES	6q21	2534	212486_s_at
PIP4K2A	phosphatidylinositol-5-phosphate 4-kinase, type II, alpha	10p12.2	5305	212829_at
MAP4K1	mitogen-activated protein kinase kinase kinase kinase 1	19q13.1-q13.4	11184	214339_s_at
CD7	CD7 molecule	17q25.2-q25.3	924	214551_s_at
TRAT1	T cell receptor associated transmembrane adaptor 1	3q13	50852	217147_s_at
PRKCH	protein kinase C, eta	14q22-q23	5583	218764_at
FYB	FYN binding protein (FYB-120/130)	5p13.1	2533	227266_s_at
JAK3	Janus kinase 3 (a protein tyrosine kinase, leukocyte)	19p13.1	3718	227677_at
MLKL	mixed lineage kinase domain-like	16q22.3	197259	238025_at
SYK	spleen tyrosine kinase	9q22	6850	244023_at
STK10	serine/threonine kinase 10	5q35.1	6793	40420_at
Proliferation-related cluster
TK1	thymidine kinase 1, soluble	17q23.2-q25.3	7083	1554408_a_at
CDKN3	cyclin-dependent kinase inhibitor 3	14q22	1033	1555758_a_at
CKS1B	CDC28 protein kinase regulatory subunit 1B	1q21.2	1163	201897_s_at
PLK1	polo-like kinase 1 (Drosophila)	16p12.1	5347	202240_at
BUB1B	budding uninhibited by benzimidazoles 1 homolog beta (yeast)	15q15	701	203755_at
CKS2	CDC28 protein kinase regulatory subunit 2	9q22	1164	204170_s_at
DBF4	DBF4 homolog (S. cerevisiae)	7q21.3	10926	204244_s_at
NEK2	NIMA (never in mitosis gene a)-related kinase 2	1q32.2-q41	4751	204641_at
TTK	TTK protein kinase	6q13-q21	7272	204822_at
MELK	maternal embryonic leucine zipper kinase	9p13.2	9833	204825_at
PLK4	polo-like kinase 4 (Drosophila)	4q28	10733	204887_s_at
CHEK1	CHK1 checkpoint homolog (S. pombe)	11q24-q24	1111	205394_at
FXN	frataxin	9q13-q21.1	2395	205565_s_at
AURKB	aurora kinase B	17p13.1	9212	209464_at
BUB1	budding uninhibited by benzimidazoles 1 homolog (yeast)	2q14	699	209642_at
UCK2	uridine-cytidine kinase 2	1q23	7371	209825_s_at
CDC2	cell division cycle 2, G1 to S and G2 to M	10q21.1	983	210559_s_at
MAPKAPK5	mitogen-activated protein kinase-activated protein kinase 5	12q24.12-q24.13	8550	212871_at
PBK	PDZ binding kinase	8p21.2	55872	219148_at
RPRD1A	regulation of nuclear pre-mRNA domain containing 1A	18q12.2	55197	218209_s_at
Biologicaly unspecific cluster
CDK8	cyclin-dependent kinase 8	13q12	1024	1553112_s_at
ADAM9	ADAM metallopeptidase domain 9 (meltrin gamma)	8p11.23	8754	1555326_a_at
PAK2	p21 protein (Cdc42/Rac)-activated kinase 2	3q29	5062	1559052_s_at
RIOK3	RIO kinase 3 (yeast)	18q11.2	8780	202129_s_at
DLG1	discs, large homolog 1 (Drosophila)	3q29	1739	202516_s_at
MAP4K5	mitogen-activated protein kinase kinase kinase kinase 5	14q11.2-q21	11183	203553_s_at
RPS6KA3	ribosomal protein S6 kinase, 90kDa, polypeptide 3	Xp22.2-p22.1	6197	203843_at
PIK3CA	phosphoinositide-3-kinase, catalytic, alpha polypeptide	3q26.3	5290	204369_at
CASK	calcium/calmodulin-dependent serine protein kinase (MAGUK family)	Xp11.4	8573	207620_s_at
TLK1	tousled-like kinase 1	2q31.1	9874	210379_s_at
PRKDC	protein kinase, DNA-activated, catalytic polypeptide	8q11	5591	210543_s_at
PRPF4B	PRP4 pre-mRNA processing factor 4 homolog B (yeast)	6p25.2	8899	211090_s_at
TLK2	tousled-like kinase 2	17q23	11011	212986_s_at
ROCK1	Rho-associated, coiled-coil containing protein kinase 1	18q11.1	6093	214578_s_at
WEE1	WEE1 homolog (S. pombe)	11p15.3-p15.1	7465	215711_s_at
RYK	RYK receptor-like tyrosine kinase	3q22	6259	216976_s_at
PGK1	phosphoglycerate kinase 1	Xq13	5230	217356_s_at
GALK2	galactokinase 2	15q21.1	2585	205219_s_at
ADK	adenosine kinase	10q22|10q11-q24	132	204119_s_at
MPZL1	myelin protein zero-like 1	1q24.2	9019	210087_s_at
ABI1	abl-interactor 1	10p11.2	10006	209027_s_at
