# Supplementary material for: Kinome expression profiling and prognosis of basal breast cancers
Source: Mol Cancer. 2011 Jul 21;10:86. doi: 10.1186/1476-4598-10-86 (PMC3156788; doi:10.1186/1476-4598-10-86)
Supplement: Additional file 8 — Table S7: Ingenuity canonical pathways associated with the immune-related cluster. [file 1476-4598-10-86-S8.XLS]

## Sheet: Table S7
Table S7: Ingenuity canonical pathways associated with the immune-related cluster
Ingenuity Canonical Pathways *	p	Nb genes**	Gene symbol
Fcγ Receptor-mediated phagocytosis in Macropheges and Monocytes	3.54 E-13	9	FGD, FYB, FYN, LCP2, PRKCB, PRKCH, PRKCQ, PTK2B, SYK
Phospholipase C Signaling	4.68 E-13	11	BTK, CD3E, FYN, ITK, LCK, LCP2, PRKCB, PRKCQ, PTK2B, SYK, ZAP70
T Cell Receptor Signaling	8.16 E-13	9	BTK, CD4, CD3E, FYN, ITK, LCK, LCP2, PRKCQ, ZAP70,
Role of NFAT in Regulation of the Immune Response	1.66 E-12	10	BTK, CD4, CD3E, FYN, ITK, LCK, LCP2, PRKCQ, SYK, ZAP70,
CD28 Signaling in T Helper Cells	2.98 E-12	9	CD4, CD3E, FYN, ITK, LCK, LCP2, PRKCQ, SYK, ZAP70,
CTLA4 Signaling in Cytotoxic T lymphocytes	1.02 E-11	8	CD4, CD3E, FYN, LCK, LCP2, SYK, TRAT1, ZAP70,
Natural Killer Celle Signaling	1.55 E-11	8	FYN, LCK, LCP2, PRKCB, PRKCH, PRKCQ, SYK, ZAP70
Calcium-induces T Lymphocyte Apoptosis	3.58 E-11	7	CD4, CD3E, LCK, PRKCB, PRKCH, PRKCQ, ZAP70
iCOS-iCOSL Signaling in T Helper	6.23 E-11	8	CD4, CD3E, ITK, LCK, LCP2, PRKCQ, TRAT1, ZAP70
CCR5 Signaling in Macrophages	1.29 E-10	7	CCL4, CD4, CD3E, PRKCB, PRKCH, PRKCQ, PTK2B
Primary Immunodeficiency Signaling	3.82 E-10	6	BTK, CD4, CD3E, JAK3, LCK, ZAP70
Fc Epsilon RI Signaling	1.15 E-09	7	BTK, FYN, LCP2, PRKCB, PRKCH, PRKCQ, SYK
Reelin Signaling in Neurons	7.11 E-07	5	BLK, FGR, FYN, LCK, MAP4K1
NF-kB Activation by Viruses	7.64 E-07	5	CD4, LCK, PRKCB, PRKCH, PRKCQ
Leukocyte Extravasation Signaling	2.21 E-06	6	BTK, ITK, PRKCB, PRKCH, PRKCQ, PTK2B
p70S6K Signaling	5.74 E-06	5	BTK, PRKCB, PRKCH, PRKCQ, SYK
IL-2 Signaling	8.15 E-06	4	JAK3, LCK, PTK2B, SYK
Aldosterone Signaling in Epithelial Cells	1.87 E-05	4	PIP4K2A, PRKCB, PRKCH, PRKCQ
Prolactin Signaling	1.99 E-05	4	FYN, PRKCB, PRKCH, PRKCQ
Protein Kinase A Signaling	2.17 E-05	6	PRKCB, PRKCH, PRKCQ, PTK2B, TGFBR2, TTN
Factors promoting Cardiogenesis in Vertebrates	2.25 E-05	4	PRKCB, PRKCH, PRKCQ, TGFBR2
Virus Entry via Endocytosis Pathways	3.71 E-05	4	FYN, PRKCB, PRKCH, PRKCQ
G Beta Gamma Signaling	4.54 E-05	4	BTK, PRKCB, PRKCH, PRKCQ
Cholecystikinin/Gastrin-mediated Signaling	6.6 E-05	4	PRKCB, PRKCH, PRKCQ, PTK2B
Renin-Angiotensin Signaling	6.89 E-05	4	PRKCB, PRKCH, PRKCQ, PTK2B
Molecular Mechanisms of Cancer	7.76 E-05	6	FYN, JAK3, PRKCB, PRKCH, PRKCQ, TGFBR2
Inositol Phosphate Metabolism	1.93 E-04	4	PIP4K2A, PRKCH, PRKCQ, TRAT1
CXCR4 Signaling	2.57 E-04	4	CD4, PRKCB, PRKCH, PRKCQ
NF-kB Signaling	3.08 E-04	4	LCK, PRKCB, PRKCQ, ZAP70
B Cell Receptor Signaling	3.75 E-04	4	BTK, PRKCB, PRKCQ, SYK
Production of Nitric Oxide an Reactive Oxygen Species in Macrophages	4.18 E-04	4	JAK3, PRKCB, PRKCH, PRKCQ
IL-8 Signaling	5.02 E-04	4	PRKCB, PRKCH, PRKCQ, PTK2B
Axonal Guidance Signaling	5.9 E-03	4	FYN, PRKCB, PRKCH, PRKCQ
* Using Ingenuity Pathway Analysis, canonical pathways terms were selected to be significantly represented (p<0.05) in the immune-related cluster ; with at least 4 common genes with the 28-gene list.
** genes of the immune cluster present in the corresponding canonical pathway
